# Supplementary material
Source: PubMed Central journal article supplement (PMC10506489)
Supplement: jvi.00653-23-s0001.pdf [file jvi.00653-23-s0001.pdf]

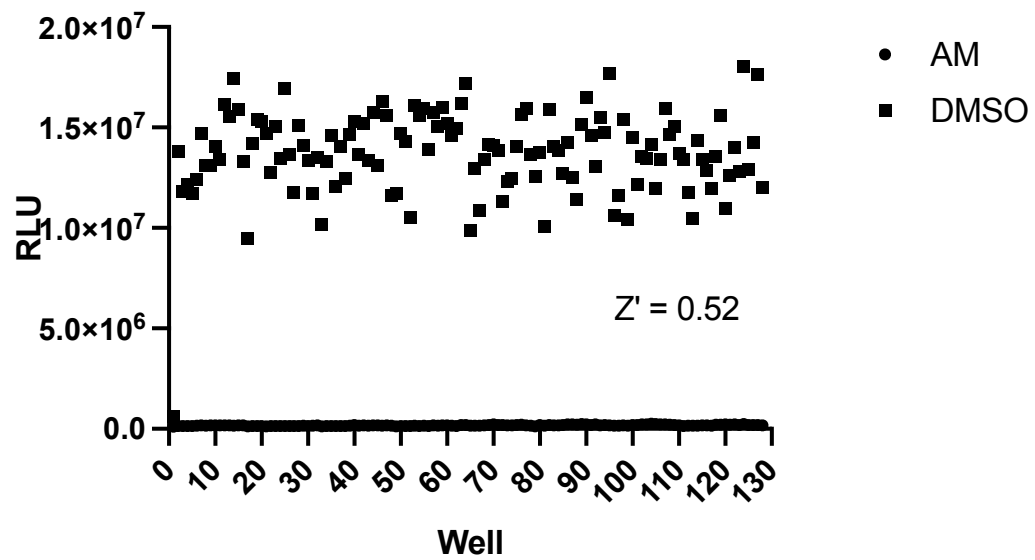

Figure S1. Z'-score for HTS assay.

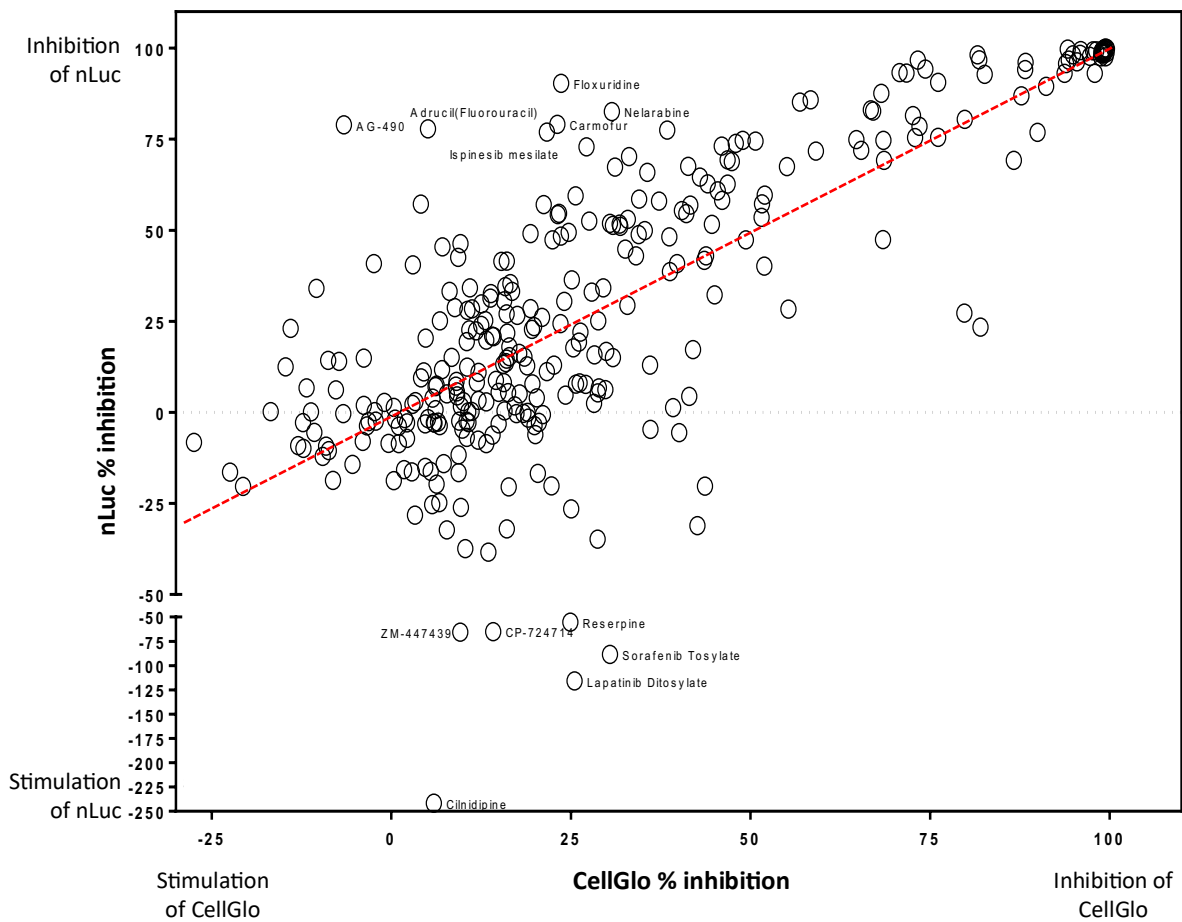

**Figure S2. Scatter plot of primary HTS assay on Selleck Chem library.** The red line indicates where equivalent effects on nLuc and CellTiter-Glo would lie, suggesting altered virus expression results from global cell effects. Compounds in the top left area show inhibition of virus expression disproportionate to cell viability effects, and compounds in the lower right area indicate stimulation of nLuc relative to cell viability effects.

**Table S1. Libraries screened.**

| Library     | Number of compounds |
|-------------|---------------------|
| EPGN        | 80                  |
| SelleckChem | 880                 |
| Anticancer  | 2500                |
| Spectrum    | 2500                |
|             |                     |
| Total       | 5900                |

**Table S2. Primers used for mutagenesis to generate reporter virus**

---

Generate reporter cassette with 5' Not1 site, Kozak sequence, nLucPest gene, P2A sequence, 3' Not1 site:

Primer 1 (Not1-nLucP2A-forward) - Not1 site underlined, Kozak sequence bolded, nLuc 5' sequence italics:  
5'-TCGGCTGCGGCCGC**ATGGGTGGCAAGTGGTCAAAACG**-3'

Primer 2 (nLucP2A-reverse) - nLucPest 3' sequence underlined, P2A 5' sequence bolded:  
5'-**GCTGAAGTTAGTAGCTCCGCTTCC**GACGTTGATGCGAGC TGAAGCACAAGC-3'

Primer 3 (P2A oligo-reverse) – Not1 site underlined, P2A sequence bolded:  
5'-

GCATTCGCGGCCGC**AGGTCCAGGGTCTCCTCCACGTCTCCAGCCTGCTTCAGCAGGCTGAAGTTAGTAGCTCCGCTTCC**-3'

Primer 4 (P2A-Not1-reverse) - Not1 site underlined, P2A sequence bolded:  
5'-GCATTCGCGGCCGC**AGGTCCAGGGTCTCCTCCACG**-3'

---

Insert Not1 site between *env* and *nef* - Not1 site underlined:

primer-A: primer *env*/forward: 5'-GAGTTAGGCAGGGATACTCACC-3

primer-B: primer *env*/reverse: 5'-CCACC CAT G GCGGCCGC CTTATAGCAAAGCTCTTTCC-3

primer-C: primer *nef*/forward: 5'-GCTATAAG GCGGCCGC C ATGGGTGGCAAGTGGTC-3

primer-D: primer vector/reverse: 5'-CCGTACGTATAGGCTGCGC-3

Primers A and B amplified a fragment of YU2 *env* and introduce a Not1 site at the *env/nef* junction.

Primers C and D amplified a fragment of YU2 *nef*, LTR and vector and introduced a Not1 site at the *env/nef* junction.

Products were combined and amplified to generate a fragment containing *env*/Not1/*nef*/LTR/vector  
Fragment was cloned back into the vector at Sal1 (5' in *env*) and Apa1 (3', in vector).

---

Amplify 5' *env* fragment to create 2bp insertion and stop codon – insertion bolded, Nde1 site underlined:

Env-stop-forward: 5'-TAGACAGGATGAGGATTAGAGCATGG-3'

Env-stop-reverse: 5'-CTGTATCATATG**TACTTTAGCATCTGATGCACAAAATAGAGTGGTGG**-3'

---

**Table S3. qPCR Primers**

|                     |                                  |
|---------------------|----------------------------------|
| nef-forward:        | 5'-CGGCGACTGGAAGAAGCG-3'         |
| nef-reverse:        | 5'-GTCTCTCTCTCCACCTTCTTCTTC-3'   |
| tat-forward:        | 5'-CGGCGACTGAATTGGGTG-3'         |
| tat-reverse:        | 5'-GTCTCTCTCTCCACCTTCTTCTTC-3'   |
| gag-forward:        | 5'-CATGTTTTTCAGCATTATCAGAAGGA-3' |
| gag-reverse:        | 5'-TGCTTGTTGTCCCCCACT-3'         |
| TAR short-forward:  | 5'-GGGTCTCTCTGGTTAGA-3'          |
| TAR short- reverse: | 5'-GGGTTTCCTAGCTAGCC-3'          |
| TAR long-forward:   | 5'-GGGTCTCTCTGGTTAGA-3'          |
| TAR long-reverse:   | 5'-CTGCTAGAGATTTTCCACACTGAC-3'   |
| GUSB-forward:       | 5'-CGCCCTGCCTATCTGTATTC-3'       |
| GUSB Reverse:       | 5'-TCCCCACAGGGAGTGTGTAG-3'       |
